# Supplementary material for: Deep Learning Diagnostic Models for Coronary Heart Disease Based on Retinal Fundus Photographs and Optical Coherence Tomography
Source: Research Square preprint supplement (doi:10.21203/rs.3.rs-6798104/v1), 2025-07-02
Supplement: Supplementary file 1 [file ef5d803cd33ab22089027963.docx]

Study Title: Deep Learning Diagnostic Models for Coronary Heart Disease Based on Retinal Fundus Photographs and Optical Coherence Tomography

Hospital/Institution: Anzhen Hospital, Capital Medical University

Ethics Approval No.: 2022194X

Dear Participant,

This research aims to develop an AI model to detect coronary heart disease (CHD) using retinal fundus photographs and optical coherence tomography (OCT). Your participation will contribute to advancing non-invasive CHD diagnostics.

Procedure:

1. Complete this brief questionnaire (within 5 minutes).

2. Provide access to your retinal images (fundus/OCT), angiography/CCTA records, physical examination results and biochemical parameters from blood samples.

3. Allow anonymized use of your data for model training.

Confidentiality:

- Your data will be de-identified and stored securely.

- Results will only be used for research purposes.

Voluntary Participation:

- You may withdraw anytime without affecting your medical care.

Consent Statement:

☐ I agree to participate and authorize the use of my retinal images and medical records for this study.

Name: ___________________

Signature: ___________________

Date: ___/___/_______

# Section 1: Demographic Information

1. Participant ID: ___________
2. Date of birth: ___ / ___ / _______
3. Date of Data Collection: ___ / ___ / _______
4. Sex:

- [ ] Male

- [ ] Female

# Section 2: Coronary heart disease (CHD) Assessment

1. Have you ever been diagnosed with coronary heart disease (CHD) by a doctor?

- [ ] Yes (Turn to question 6）

- [ ] No (Turn to Section 3)

1. Do you ever had coronary angiography（CAG）examination before？

- [ ] Yes (Turn to question 7）

- [ ] No (Turn to question 9）

1. The degree of coronary artery stenosis based on coronary angiography（CAG）examination?

- [ ] Mild (< 50%)

- [ ] Moderate (50 -70%)

- [ ] Sever (>70%)

1. The extent of coronary artery lesions based on coronary angiography（CAG）examination?

- [ ] Single-vessel lesion (Only one major vessel is narrowed.)

- [ ] Multi-vessel lesions (Stenosis of two or more major vessels, such as LAD, LCX, RCA)

- [ ] Left main coronary artery disease (Stenosis >50% is considered high risk and requires urgent management.)

1. Do you ever had coronary CT angiography（CCTA）examination before？

- [ ] Yes (Turn to question 10）

- [ ] No (Turn to question 12）

1. The degree of coronary artery stenosis based on coronary CT angiography（CCTA）examination?

- [ ] Mild (< 50%)

- [ ] Moderate (50 -70%)

- [ ] Sever (>70%)

1. The location of stenosis based on coronary CT angiography（CCTA）examination?

- [ ] Left main (LM)

- [ ] Anterior descending artery (LAD), circumflex artery (LCX), right coronary artery (RCA)

- [ ] Bifurcation lesions

1. Are you currently taking any medications for coronary heart disease?

- [ ] Yes (List medications: ____________________)

- [ ] No

1. Have you had surgery for coronary heart disease？

- [ ] No surgery history for CHD

- [ ] Percutaneous Coronary Intervention (PCI)

- [ ] Coronary Artery Bypass Grafting (CABG)

- [ ] Others（List surgical procedures: ____________________)

# Section 3: Hypertension (HTN) Assessment

1. Have you ever been diagnosed with high blood pressure (hypertension) by a doctor?

- [ ] Yes

- [ ] No

1. Are you currently taking any medications for high blood pressure?

- [ ] Yes (List medications: ____________________)

- [ ] No

1. Blood Pressure Measurement (if available):

- Systolic BP: ______ mmHg

- Diastolic BP: ______ mmHg

# Section 4: Diabetes Mellitus (DM) Assessment

1. Have you ever been diagnosed with diabetes (high blood sugar) by a doctor?

- [ ] Yes

- [ ] No

1. Are you currently taking any medications for diabetes?

- [ ] Insulin

- [ ] Oral medications (List: ____________________)

- [ ] None

1. Fasting Blood Glucose Level (if available): ______ mmol/L
2. 2-Hour Postprandial Blood Glucose Level (if available): ______ mmol/L

# Section 5: Additional Medical History

1. Have you ever been diagnosed with hyperlipidemia？

- [ ] Yes

- [ ] No

1. Are you currently taking any lipid-lowering agents?

- [ ] Yes (List medications: ____________________)

- [ ] No

1. Do you have any other chronic medical conditions?

- [ ] Kidney disease

- [ ] Stroke

- [ ] Other (specify): _______________

# Section 6: Ophthalmic History

1. Do you have any history of intraocular surgery/laser therapy?

- [ ] Yes, a history of _______________

- [ ] No

1. Do you have any history of severe cataract and other ocular diseases (e.g., age-related macular degeneration, uncontrolled glaucoma, retinal vascular occlusion) ?

- [ ] Yes, a history of _______________

- [ ] No

Thank you for your participation!

Your contribution helps improve early CHD detection. For questions, contact:

drxinxiaogao@hotmail.com |Department of Ophthalmology, Beijing Anzhen Hospital, Capital Medical University.

Data Use Confirmation:

☐ I confirm my anonymized data may be used in publications or AI model development.

Participant Copy: ☐ Requested (optional)
